# Supplementary material for: Identification and characterization of circular RNAs in Qinchuan cattle testis
Source: R Soc Open Sci. 2018 Jul 25;5(7):180413. doi: 10.1098/rsos.180413 (PMC6083711; doi:10.1098/rsos.180413)
Supplement: Table S2 Significantly enriched pathway of differential expressed circRNAs [file rsos180413supp2.xlsx]

## Sheet: Sheet1
KEGG_A_class	KEGG_B_class	Pathway	N-vs-A(679)	All (6950)	Pvalue	Qvalue	Pathway ID
Genetic Information Processing	Folding, sorting and degradation	Ubiquitin mediated proteolysis	34	138	2.4261e-07	5.07055e-05	ko04120
Genetic Information Processing	Replication and repair	Fanconi anemia pathway	16	53	2.70309e-05	0.00282473	ko03460
Metabolism	Amino acid metabolism	Lysine degradation	14	54	0.000502093	0.0305814	ko00310
Cellular Processes	Cellular commiunity	Tight junction	26	136	0.00058529	0.0305814	ko04530
Cellular Processes	Cellular commiunity	Adherens junction	16	69	0.000787201	0.032905	ko04520
Organismal Systems	Nervous system	Neurotrophin signaling pathway	23	122	0.00144861	0.0403747	ko04722
Genetic Information Processing	Folding, sorting and degradation	Protein processing in endoplasmic reticulum	29	167	0.00145544	0.0403747	ko04141
Metabolism	Carbohydrate metabolism	Propanoate metabolism	9	30	0.00167041	0.0403747	ko00640
Environmental Information Processing	Signal transduction	mTOR signaling pathway	14	61	0.00183031	0.0403747	ko04150
Organismal Systems	Endocrine system	Progesterone-mediated oocyte maturation	18	89	0.0020614	0.0403747	ko04914
Metabolism	Global and Overview	Fatty acid metabolism	12	49	0.00212498	0.0403747	ko01212
Organismal Systems	Endocrine system	Adipocytokine signaling pathway	15	70	0.00263428	0.043465	ko04920
Genetic Information Processing	Translation	Aminoacyl-tRNA biosynthesis	11	44	0.00270357	0.043465	ko00970
Organismal Systems	Development	Axon guidance	22	125	0.00441705	0.0626624	ko04360
Environmental Information Processing	Signal transduction	Rap1 signaling pathway	33	212	0.0044973	0.0626624	ko04015
Environmental Information Processing	Signal transduction	Phosphatidylinositol signaling system	18	97	0.0054419	0.0710849	ko04070
Environmental Information Processing	Signal transduction	TGF-beta signaling pathway	16	83	0.00584638	0.0718761	ko04350
Organismal Systems	Environmental adaptation	Circadian rhythm	8	31	0.00821758	0.0905135	ko04710
Cellular Processes	Transport and catabolism	Endocytosis	37	254	0.0082285	0.0905135	ko04144
Cellular Processes	Cell growth and death	Oocyte meiosis	20	117	0.00896579	0.0936925	ko04114
Cellular Processes	Cellular commiunity	Focal adhesion	31	206	0.00945188	0.0940688	ko04510
Organismal Systems	Endocrine system	Glucagon signaling pathway	17	96	0.0108706	0.103271	ko04922
Environmental Information Processing	Signal transduction	FoxO signaling pathway	21	129	0.0129884	0.118025	ko04068
Organismal Systems	Endocrine system	Thyroid hormone signaling pathway	19	114	0.0138904	0.120962	ko04919
Organismal Systems	Nervous system	Glutamatergic synapse	19	115	0.015174	0.126854	ko04724
Organismal Systems	Aging	Longevity regulating pathway - mammal	16	94	0.0189557	0.146008	ko04211
Environmental Information Processing	Signal transduction	Ras signaling pathway	33	234	0.0190517	0.146008	ko04014
Cellular Processes	Cell growth and death	Cell cycle	20	126	0.0195609	0.146008	ko04110
Environmental Information Processing	Signal transduction	ErbB signaling pathway	15	88	0.022379	0.158256	ko04012
Environmental Information Processing	Signal transduction	Hippo signaling pathway	23	153	0.0235495	0.158256	ko04390
Environmental Information Processing	Signal transduction	AMPK signaling pathway	19	121	0.0249357	0.158256	ko04152
Metabolism	Metabolism of cofactors and vitamins	One carbon pool by folate	5	18	0.0255875	0.158256	ko00670
Organismal Systems	Immune system	B cell receptor signaling pathway	13	74	0.025664	0.158256	ko04662
Metabolism	Metabolism of other amino acids	D-Glutamine and D-glutamate metabolism	2	3	0.026739	0.158256	ko00471
Metabolism	Carbohydrate metabolism	Citrate cycle (TCA cycle)	7	31	0.0270114	0.158256	ko00020
Organismal Systems	Nervous system	Retrograde endocannabinoid signaling	17	106	0.0272595	0.158256	ko04723
Metabolism	Lipid metabolism	Biosynthesis of unsaturated fatty acids	6	25	0.0299481	0.169166	ko01040
Genetic Information Processing	Translation	RNA transport	23	157	0.0308428	0.169635	ko03013
Metabolism	Carbohydrate metabolism	Inositol phosphate metabolism	12	69	0.0335998	0.180061	ko00562
Environmental Information Processing	Signaling molecules and interaction	ECM-receptor interaction	14	85	0.0348864	0.182281	ko04512
Organismal Systems	Development	Dorso-ventral axis formation	6	26	0.0358261	0.182626	ko04320
Organismal Systems	Immune system	Fc gamma R-mediated phagocytosis	14	86	0.0380876	0.189531	ko04666
Environmental Information Processing	Signal transduction	Sphingolipid signaling pathway	18	119	0.0396672	0.192801	ko04071
Genetic Information Processing	Folding, sorting and degradation	SNARE interactions in vesicular transport	7	34	0.0428681	0.200789	ko04130
Environmental Information Processing	Signal transduction	cAMP signaling pathway	27	197	0.0434869	0.200789	ko04024
Organismal Systems	Sensory system	Inflammatory mediator regulation of TRP channels	16	104	0.0441928	0.200789	ko04750
Environmental Information Processing	Signal transduction	Wnt signaling pathway	20	138	0.0463223	0.205987	ko04310
Metabolism	Carbohydrate metabolism	Butanoate metabolism	6	28	0.0496758	0.216297	ko00650
