# Supplementary material for: Identification and characterization of circular RNAs in Qinchuan cattle testis
Source: R Soc Open Sci. 2018 Jul 25;5(7):180413. doi: 10.1098/rsos.180413 (PMC6083711; doi:10.1098/rsos.180413)
Supplement: Table S5 MicroRNA target site analysis for differential expressed circRNAs [file rsos180413supp5.xlsx]

## Sheet: Sheet1
circRNA_id	miRNA
novel_circ_000005	bta-miR-138
novel_circ_000005	bta-miR-2284aa
novel_circ_000005	bta-miR-2284ab
novel_circ_000005	bta-miR-2284c
novel_circ_000005	bta-miR-2284d
novel_circ_000005	bta-miR-2284s
novel_circ_000005	bta-miR-2284z
novel_circ_000005	bta-miR-2338
novel_circ_000005	bta-miR-2343
novel_circ_000005	bta-miR-2347
novel_circ_000005	bta-miR-2381
novel_circ_000005	bta-miR-2452
novel_circ_000005	bta-miR-2455
novel_circ_000005	bta-miR-362-5p
novel_circ_000005	bta-miR-411c-5p
novel_circ_000005	bta-miR-432
novel_circ_000005	bta-miR-449d
novel_circ_000005	bta-miR-6119-5p
novel_circ_000005	bta-miR-664a
novel_circ_000012	bta-miR-1246
novel_circ_000012	bta-miR-197
novel_circ_000012	bta-miR-2322-5p
novel_circ_000012	bta-miR-2353
novel_circ_000012	bta-miR-2367-3p
novel_circ_000012	bta-miR-329a
novel_circ_000012	bta-miR-362-3p
novel_circ_000012	bta-miR-488
novel_circ_000012	bta-miR-502b
novel_circ_000031	bta-miR-143
novel_circ_000031	bta-miR-214
novel_circ_000031	bta-miR-2439-5p
novel_circ_000031	bta-miR-2893
novel_circ_000031	bta-miR-6530
novel_circ_000031	bta-miR-677
novel_circ_000036	bta-miR-1284
novel_circ_000036	bta-miR-2317
novel_circ_000036	bta-miR-2325b
novel_circ_000036	bta-miR-2329-3p
novel_circ_000036	bta-miR-2346
novel_circ_000036	bta-miR-2367-3p
novel_circ_000036	bta-miR-2377
novel_circ_000036	bta-miR-2379
novel_circ_000036	bta-miR-2382-3p
novel_circ_000036	bta-miR-2387
novel_circ_000036	bta-miR-2893
novel_circ_000036	bta-miR-2898
novel_circ_000036	bta-miR-381
novel_circ_000036	bta-miR-455-5p
novel_circ_000036	bta-miR-631
novel_circ_000036	bta-miR-769
novel_circ_000040	bta-miR-1197
novel_circ_000040	bta-miR-1281
novel_circ_000040	bta-miR-193a-3p
novel_circ_000040	bta-miR-193b
novel_circ_000040	bta-miR-199a-3p
novel_circ_000040	bta-miR-210
novel_circ_000040	bta-miR-2327
novel_circ_000040	bta-miR-2388-5p
novel_circ_000040	bta-miR-2425-3p
novel_circ_000040	bta-miR-2433
novel_circ_000040	bta-miR-2452
novel_circ_000040	bta-miR-2460
novel_circ_000040	bta-miR-2882
novel_circ_000040	bta-miR-2889
novel_circ_000040	bta-miR-2899
novel_circ_000040	bta-miR-302a
novel_circ_000040	bta-miR-345-5p
novel_circ_000040	bta-miR-764
novel_circ_000044	bta-miR-1584-3p
novel_circ_000044	bta-miR-216a
novel_circ_000044	bta-miR-2284v
novel_circ_000044	bta-miR-2284w
novel_circ_000044	bta-miR-2383
novel_circ_000044	bta-miR-2410
novel_circ_000044	bta-miR-2460
novel_circ_000044	bta-miR-28
novel_circ_000044	bta-miR-329b
novel_circ_000044	bta-miR-6119-3p
novel_circ_000044	bta-miR-6533
novel_circ_000044	bta-miR-759
novel_circ_000053	bta-miR-145
novel_circ_000053	bta-miR-181a
novel_circ_000053	bta-miR-181b
novel_circ_000053	bta-miR-181c
novel_circ_000053	bta-miR-181d
novel_circ_000053	bta-miR-2352
novel_circ_000053	bta-miR-2353
novel_circ_000053	bta-miR-2399-3p
novel_circ_000053	bta-miR-2462
novel_circ_000053	bta-miR-2480
novel_circ_000053	bta-miR-2486-3p
novel_circ_000053	bta-miR-302a
novel_circ_000053	bta-miR-378d
novel_circ_000057	bta-miR-143
novel_circ_000057	bta-miR-148a
novel_circ_000057	bta-miR-148b
novel_circ_000057	bta-miR-449d
novel_circ_000057	bta-miR-562
novel_circ_000057	bta-miR-664a
novel_circ_000061	bta-miR-2317
novel_circ_000061	bta-miR-2465
novel_circ_000061	bta-miR-449d
novel_circ_000061	bta-miR-6123
novel_circ_000061	bta-miR-7
novel_circ_000069	bta-miR-153
novel_circ_000069	bta-miR-1584-3p
novel_circ_000069	bta-miR-187
novel_circ_000069	bta-miR-2378
novel_circ_000069	bta-miR-2443
novel_circ_000069	bta-miR-505
novel_circ_000080	bta-miR-2301
novel_circ_000080	bta-miR-2320-5p
novel_circ_000080	bta-miR-2899
novel_circ_000080	bta-miR-29e
novel_circ_000080	bta-miR-6120-3p
novel_circ_000082	bta-miR-2392
novel_circ_000082	bta-miR-2881
novel_circ_000082	bta-miR-2900
novel_circ_000082	bta-miR-3141
novel_circ_000082	bta-miR-490
novel_circ_000082	bta-miR-544a
novel_circ_000082	bta-miR-544b
novel_circ_000082	bta-miR-6529a
novel_circ_000082	bta-miR-761
novel_circ_000083	bta-miR-133c
novel_circ_000083	bta-miR-141
novel_circ_000083	bta-miR-200a
novel_circ_000083	bta-miR-2332
novel_circ_000083	bta-miR-2350
novel_circ_000083	bta-miR-2464-5p
novel_circ_000083	bta-miR-2478
novel_circ_000083	bta-miR-451
novel_circ_000083	bta-miR-486
novel_circ_000083	bta-miR-582
novel_circ_000123	bta-miR-1584-3p
novel_circ_000123	bta-miR-216b
novel_circ_000123	bta-miR-2285t
novel_circ_000123	bta-miR-2288
novel_circ_000123	bta-miR-2303
novel_circ_000123	bta-miR-2341
novel_circ_000123	bta-miR-2346
novel_circ_000123	bta-miR-2354
novel_circ_000123	bta-miR-28
novel_circ_000123	bta-miR-2895
novel_circ_000123	bta-miR-365-3p
novel_circ_000123	bta-miR-382
novel_circ_000123	bta-miR-4680
novel_circ_000123	bta-miR-541
novel_circ_000123	bta-miR-543
novel_circ_000123	bta-miR-599
novel_circ_000123	bta-miR-708
novel_circ_000126	bta-miR-2285t
novel_circ_000126	bta-miR-2288
novel_circ_000126	bta-miR-2303
novel_circ_000126	bta-miR-2346
novel_circ_000126	bta-miR-2895
novel_circ_000126	bta-miR-365-3p
novel_circ_000126	bta-miR-382
novel_circ_000126	bta-miR-541
novel_circ_000126	bta-miR-599
novel_circ_000128	bta-miR-2285t
novel_circ_000128	bta-miR-2288
novel_circ_000128	bta-miR-2346
novel_circ_000128	bta-miR-2895
novel_circ_000128	bta-miR-382
novel_circ_000128	bta-miR-599
novel_circ_000140	bta-miR-1287
novel_circ_000140	bta-miR-191
novel_circ_000140	bta-miR-2297
novel_circ_000140	bta-miR-2299-3p
novel_circ_000140	bta-miR-2316
novel_circ_000140	bta-miR-2323
novel_circ_000140	bta-miR-2341
novel_circ_000140	bta-miR-2354
novel_circ_000140	bta-miR-2394
novel_circ_000140	bta-miR-2432
novel_circ_000140	bta-miR-2471-5p
novel_circ_000140	bta-miR-2473
novel_circ_000140	bta-miR-2482
novel_circ_000140	bta-miR-539
novel_circ_000140	bta-miR-664a
novel_circ_000141	bta-miR-1721
novel_circ_000141	bta-miR-2285a
novel_circ_000141	bta-miR-2303
novel_circ_000141	bta-miR-2309
novel_circ_000141	bta-miR-2434
novel_circ_000141	bta-miR-2902
novel_circ_000141	bta-miR-6120-3p
novel_circ_000145	bta-miR-137
novel_circ_000145	bta-miR-138
novel_circ_000145	bta-miR-155
novel_circ_000145	bta-miR-1584-5p
novel_circ_000145	bta-miR-1603
novel_circ_000145	bta-miR-199a-3p
novel_circ_000145	bta-miR-224
novel_circ_000145	bta-miR-2284x
novel_circ_000145	bta-miR-2285aa
novel_circ_000145	bta-miR-2287
novel_circ_000145	bta-miR-2306
novel_circ_000145	bta-miR-2323
novel_circ_000145	bta-miR-2326
novel_circ_000145	bta-miR-2349
novel_circ_000145	bta-miR-2353
novel_circ_000145	bta-miR-2374
novel_circ_000145	bta-miR-2394
novel_circ_000145	bta-miR-23b-5p
novel_circ_000145	bta-miR-2412
novel_circ_000145	bta-miR-2415-3p
novel_circ_000145	bta-miR-2427
novel_circ_000145	bta-miR-2431-5p
novel_circ_000145	bta-miR-2437
novel_circ_000145	bta-miR-2439-3p
novel_circ_000145	bta-miR-2462
novel_circ_000145	bta-miR-2471-3p
novel_circ_000145	bta-miR-2897
novel_circ_000145	bta-miR-2898
novel_circ_000145	bta-miR-361
novel_circ_000145	bta-miR-365-5p
novel_circ_000145	bta-miR-378
novel_circ_000145	bta-miR-378c
novel_circ_000145	bta-miR-378d
novel_circ_000145	bta-miR-483
novel_circ_000145	bta-miR-500
novel_circ_000145	bta-miR-584
novel_circ_000145	bta-miR-6523a
novel_circ_000145	bta-miR-665
novel_circ_000146	bta-miR-1584-5p
novel_circ_000146	bta-miR-1814c
novel_circ_000146	bta-miR-199a-3p
novel_circ_000146	bta-miR-204
novel_circ_000146	bta-miR-211
novel_circ_000146	bta-miR-224
novel_circ_000146	bta-miR-2284h-3p
novel_circ_000146	bta-miR-2285aa
novel_circ_000146	bta-miR-2285ad
novel_circ_000146	bta-miR-2285n
novel_circ_000146	bta-miR-2285y
novel_circ_000146	bta-miR-2287
novel_circ_000146	bta-miR-2306
novel_circ_000146	bta-miR-2326
novel_circ_000146	bta-miR-2331-5p
novel_circ_000146	bta-miR-2353
novel_circ_000146	bta-miR-2374
novel_circ_000146	bta-miR-2404
novel_circ_000146	bta-miR-2412
novel_circ_000146	bta-miR-2415-3p
novel_circ_000146	bta-miR-2447
novel_circ_000146	bta-miR-2452
novel_circ_000146	bta-miR-2459
novel_circ_000146	bta-miR-2466-5p
novel_circ_000146	bta-miR-2471-3p
novel_circ_000146	bta-miR-2902
novel_circ_000146	bta-miR-3578
novel_circ_000146	bta-miR-502b
novel_circ_000146	bta-miR-761
novel_circ_000153	bta-miR-128
novel_circ_000153	bta-miR-2366
novel_circ_000153	bta-miR-2399-3p
novel_circ_000153	bta-miR-24-3p
novel_circ_000153	bta-miR-2450a
novel_circ_000153	bta-miR-2454-5p
novel_circ_000153	bta-miR-489
novel_circ_000153	bta-miR-6120-3p
novel_circ_000159	bta-miR-1
novel_circ_000159	bta-miR-1434-3p
novel_circ_000159	bta-miR-145
novel_circ_000159	bta-miR-1584-3p
novel_circ_000159	bta-miR-205
novel_circ_000159	bta-miR-206
novel_circ_000159	bta-miR-2285aa
novel_circ_000159	bta-miR-2288
novel_circ_000159	bta-miR-2356
novel_circ_000159	bta-miR-2425-3p
novel_circ_000159	bta-miR-2463
novel_circ_000159	bta-miR-2891
novel_circ_000159	bta-miR-2902
novel_circ_000159	bta-miR-6516
novel_circ_000159	bta-miR-6534
novel_circ_000160	bta-miR-145
novel_circ_000160	bta-miR-1584-3p
novel_circ_000160	bta-miR-205
novel_circ_000160	bta-miR-6516
novel_circ_000178	bta-miR-136
novel_circ_000178	bta-miR-150
novel_circ_000178	bta-miR-199c
novel_circ_000178	bta-miR-2458
novel_circ_000178	bta-miR-28
novel_circ_000178	bta-miR-708
novel_circ_000187	bta-miR-106a
novel_circ_000187	bta-miR-106b
novel_circ_000187	bta-miR-138
novel_circ_000187	bta-miR-17-3p
novel_circ_000187	bta-miR-17-5p
novel_circ_000187	bta-miR-20a
novel_circ_000187	bta-miR-20b
novel_circ_000187	bta-miR-219-3p
novel_circ_000187	bta-miR-26a
novel_circ_000187	bta-miR-328
novel_circ_000187	bta-miR-411c-3p
novel_circ_000187	bta-miR-411c-5p
novel_circ_000195	bta-miR-181a
novel_circ_000195	bta-miR-181c
novel_circ_000195	bta-miR-2372
novel_circ_000195	bta-miR-2399-3p
novel_circ_000195	bta-miR-2434
novel_circ_000195	bta-miR-299
novel_circ_000201	bta-miR-2285t
novel_circ_000201	bta-miR-2379
novel_circ_000201	bta-miR-2381
novel_circ_000201	bta-miR-449d
novel_circ_000202	bta-miR-2284q
novel_circ_000202	bta-miR-2284r
novel_circ_000202	bta-miR-2285t
novel_circ_000202	bta-miR-2285w
novel_circ_000202	bta-miR-2333
novel_circ_000202	bta-miR-2368-5p
novel_circ_000202	bta-miR-2379
novel_circ_000202	bta-miR-2381
novel_circ_000202	bta-miR-2400
novel_circ_000202	bta-miR-320a
novel_circ_000202	bta-miR-375
novel_circ_000202	bta-miR-449d
novel_circ_000202	bta-miR-7
novel_circ_000203	bta-miR-1284
novel_circ_000203	bta-miR-2284q
novel_circ_000203	bta-miR-2284r
novel_circ_000203	bta-miR-2285t
novel_circ_000203	bta-miR-2285w
novel_circ_000203	bta-miR-2298
novel_circ_000203	bta-miR-2333
novel_circ_000203	bta-miR-2368-5p
novel_circ_000203	bta-miR-2379
novel_circ_000203	bta-miR-2381
novel_circ_000203	bta-miR-2400
novel_circ_000203	bta-miR-2470
novel_circ_000203	bta-miR-2471-3p
novel_circ_000203	bta-miR-320a
novel_circ_000203	bta-miR-375
novel_circ_000203	bta-miR-449d
novel_circ_000203	bta-miR-6119-3p
novel_circ_000203	bta-miR-7
novel_circ_000212	bta-miR-153
novel_circ_000212	bta-miR-181a
novel_circ_000212	bta-miR-181b
novel_circ_000212	bta-miR-181d
novel_circ_000212	bta-miR-2330-5p
novel_circ_000212	bta-miR-2363
novel_circ_000212	bta-miR-2379
novel_circ_000212	bta-miR-2381
novel_circ_000212	bta-miR-2397-3p
novel_circ_000212	bta-miR-23a
novel_circ_000212	bta-miR-23b-3p
novel_circ_000212	bta-miR-2483-3p
novel_circ_000212	bta-miR-2488
novel_circ_000212	bta-miR-449d
novel_circ_000212	bta-miR-487a
novel_circ_000212	bta-miR-655
novel_circ_000213	bta-miR-1584-3p
novel_circ_000213	bta-miR-21-3p
novel_circ_000213	bta-miR-2284t-5p
novel_circ_000213	bta-miR-2293
novel_circ_000213	bta-miR-2338
novel_circ_000213	bta-miR-2352
novel_circ_000213	bta-miR-2440
novel_circ_000213	bta-miR-2488
novel_circ_000213	bta-miR-363
novel_circ_000213	bta-miR-421
novel_circ_000213	bta-miR-489
novel_circ_000213	bta-miR-500
novel_circ_000213	bta-miR-539
novel_circ_000214	bta-miR-1584-3p
novel_circ_000214	bta-miR-21-3p
novel_circ_000214	bta-miR-2284t-5p
novel_circ_000214	bta-miR-2291
novel_circ_000214	bta-miR-2293
novel_circ_000214	bta-miR-2338
novel_circ_000214	bta-miR-2352
novel_circ_000214	bta-miR-2379
novel_circ_000214	bta-miR-2440
novel_circ_000214	bta-miR-2488
novel_circ_000214	bta-miR-363
novel_circ_000214	bta-miR-421
novel_circ_000214	bta-miR-450b
novel_circ_000214	bta-miR-489
novel_circ_000214	bta-miR-500
novel_circ_000214	bta-miR-539
novel_circ_000214	bta-miR-6523b
novel_circ_000217	bta-let-7a-5p
novel_circ_000217	bta-let-7b
novel_circ_000217	bta-let-7c
novel_circ_000217	bta-let-7e
novel_circ_000217	bta-let-7f
novel_circ_000217	bta-let-7g
novel_circ_000217	bta-let-7i
novel_circ_000217	bta-miR-1224
novel_circ_000217	bta-miR-130b
novel_circ_000217	bta-miR-144
novel_circ_000217	bta-miR-196b
novel_circ_000217	bta-miR-214
novel_circ_000217	bta-miR-2285q
novel_circ_000217	bta-miR-2456
novel_circ_000217	bta-miR-2475
novel_circ_000217	bta-miR-2486-3p
novel_circ_000217	bta-miR-27b
novel_circ_000217	bta-miR-452
novel_circ_000217	bta-miR-454
novel_circ_000217	bta-miR-6527
novel_circ_000217	bta-miR-761
novel_circ_000222	bta-miR-147
novel_circ_000222	bta-miR-210
novel_circ_000222	bta-miR-2284ac
novel_circ_000222	bta-miR-2350
novel_circ_000222	bta-miR-2388-5p
novel_circ_000222	bta-miR-2468
novel_circ_000222	bta-miR-455-3p
novel_circ_000222	bta-miR-544b
novel_circ_000222	bta-miR-7
novel_circ_000227	bta-miR-1777a
novel_circ_000227	bta-miR-2285ab
novel_circ_000227	bta-miR-2285ac
novel_circ_000227	bta-miR-2285f
novel_circ_000227	bta-miR-2316
novel_circ_000227	bta-miR-2327
novel_circ_000227	bta-miR-2433
novel_circ_000227	bta-miR-2462
novel_circ_000227	bta-miR-326
novel_circ_000227	bta-miR-503-5p
novel_circ_000227	bta-miR-6519
novel_circ_000227	bta-miR-760-3p
novel_circ_000230	bta-miR-10a
novel_circ_000230	bta-miR-10b
novel_circ_000230	bta-miR-1282
novel_circ_000230	bta-miR-140
novel_circ_000230	bta-miR-2384
novel_circ_000230	bta-miR-2459
novel_circ_000232	bta-miR-128
novel_circ_000232	bta-miR-140
novel_circ_000232	bta-miR-216b
novel_circ_000232	bta-miR-2303
novel_circ_000232	bta-miR-2364
novel_circ_000232	bta-miR-2417
novel_circ_000232	bta-miR-2454-3p
novel_circ_000232	bta-miR-2891
novel_circ_000232	bta-miR-376c
novel_circ_000232	bta-miR-378d
novel_circ_000232	bta-miR-599
novel_circ_000232	bta-miR-660
novel_circ_000238	bta-miR-1193
novel_circ_000238	bta-miR-199b
novel_circ_000238	bta-miR-200c
novel_circ_000238	bta-miR-22-5p
novel_circ_000238	bta-miR-223
novel_circ_000238	bta-miR-2284h-5p
novel_circ_000238	bta-miR-2307
novel_circ_000238	bta-miR-2365
novel_circ_000238	bta-miR-2376
novel_circ_000238	bta-miR-2426
novel_circ_000238	bta-miR-2439-5p
novel_circ_000238	bta-miR-2461-3p
novel_circ_000238	bta-miR-331-3p
novel_circ_000238	bta-miR-338
novel_circ_000238	bta-miR-377
novel_circ_000238	bta-miR-544b
novel_circ_000238	bta-miR-6120-5p
novel_circ_000238	bta-miR-615
novel_circ_000238	bta-miR-759
novel_circ_000239	bta-miR-223
novel_circ_000239	bta-miR-2426
novel_circ_000239	bta-miR-2461-3p
novel_circ_000239	bta-miR-377
novel_circ_000239	bta-miR-544b
novel_circ_000239	bta-miR-759
novel_circ_000243	bta-miR-1246
novel_circ_000243	bta-miR-144
novel_circ_000243	bta-miR-1814a
novel_circ_000243	bta-miR-200c
novel_circ_000243	bta-miR-216b
novel_circ_000243	bta-miR-2284ab
novel_circ_000243	bta-miR-2284j
novel_circ_000243	bta-miR-2294
novel_circ_000243	bta-miR-2350
novel_circ_000243	bta-miR-2359
novel_circ_000243	bta-miR-2371
novel_circ_000243	bta-miR-2382-3p
novel_circ_000243	bta-miR-2385-3p
novel_circ_000243	bta-miR-2399-5p
novel_circ_000243	bta-miR-2430
novel_circ_000243	bta-miR-2431-5p
novel_circ_000243	bta-miR-2450b
novel_circ_000243	bta-miR-2482
novel_circ_000243	bta-miR-2895
novel_circ_000243	bta-miR-345-3p
novel_circ_000243	bta-miR-361
novel_circ_000243	bta-miR-362-5p
novel_circ_000243	bta-miR-378b
novel_circ_000243	bta-miR-429
novel_circ_000243	bta-miR-6122-5p
novel_circ_000245	bta-miR-154b
novel_circ_000245	bta-miR-1721
novel_circ_000245	bta-miR-193a-5p
novel_circ_000245	bta-miR-2284i
novel_circ_000245	bta-miR-2285q
novel_circ_000245	bta-miR-2294
novel_circ_000245	bta-miR-2322-3p
novel_circ_000245	bta-miR-2322-5p
novel_circ_000245	bta-miR-2338
novel_circ_000245	bta-miR-2356
novel_circ_000245	bta-miR-2381
novel_circ_000245	bta-miR-2461-3p
novel_circ_000245	bta-miR-2473
novel_circ_000245	bta-miR-331-5p
novel_circ_000245	bta-miR-361
novel_circ_000245	bta-miR-382
novel_circ_000245	bta-miR-410
novel_circ_000245	bta-miR-421
novel_circ_000245	bta-miR-505
novel_circ_000245	bta-miR-6520
novel_circ_000245	bta-miR-759
novel_circ_000247	bta-miR-154b
novel_circ_000247	bta-miR-1721
novel_circ_000247	bta-miR-193a-5p
novel_circ_000247	bta-miR-2284i
novel_circ_000247	bta-miR-2285q
novel_circ_000247	bta-miR-2294
novel_circ_000247	bta-miR-2322-3p
novel_circ_000247	bta-miR-2322-5p
novel_circ_000247	bta-miR-2356
novel_circ_000247	bta-miR-2381
novel_circ_000247	bta-miR-2461-3p
novel_circ_000247	bta-miR-2473
novel_circ_000247	bta-miR-331-5p
novel_circ_000247	bta-miR-382
novel_circ_000247	bta-miR-410
novel_circ_000247	bta-miR-421
novel_circ_000247	bta-miR-505
novel_circ_000247	bta-miR-759
novel_circ_000275	bta-miR-124a
novel_circ_000275	bta-miR-124b
novel_circ_000275	bta-miR-142-3p
novel_circ_000275	bta-miR-2400
novel_circ_000275	bta-miR-2458
novel_circ_000275	bta-miR-2486-5p
novel_circ_000275	bta-miR-2898
novel_circ_000275	bta-miR-2917
novel_circ_000275	bta-miR-33a
novel_circ_000275	bta-miR-3957
novel_circ_000299	bta-miR-1179
novel_circ_000299	bta-miR-199a-3p
novel_circ_000299	bta-miR-2352
novel_circ_000299	bta-miR-2426
novel_circ_000299	bta-miR-2489
novel_circ_000299	bta-miR-653
novel_circ_000301	bta-miR-135a
novel_circ_000301	bta-miR-135b
novel_circ_000301	bta-miR-145
novel_circ_000301	bta-miR-1814c
novel_circ_000301	bta-miR-188
novel_circ_000301	bta-miR-216b
novel_circ_000301	bta-miR-2319a
novel_circ_000301	bta-miR-2325a
novel_circ_000301	bta-miR-2486-3p
novel_circ_000301	bta-miR-26a
novel_circ_000301	bta-miR-26b
novel_circ_000301	bta-miR-375
novel_circ_000301	bta-miR-409b
novel_circ_000301	bta-miR-500
novel_circ_000305	bta-miR-1
novel_circ_000305	bta-miR-141
novel_circ_000305	bta-miR-206
novel_circ_000305	bta-miR-2369
novel_circ_000305	bta-miR-2400
novel_circ_000305	bta-miR-2404
novel_circ_000305	bta-miR-380-3p
novel_circ_000305	bta-miR-483
novel_circ_000318	bta-miR-1
novel_circ_000318	bta-miR-132
novel_circ_000318	bta-miR-182
novel_circ_000318	bta-miR-186
novel_circ_000318	bta-miR-194
novel_circ_000318	bta-miR-199c
novel_circ_000318	bta-miR-202
novel_circ_000318	bta-miR-206
novel_circ_000318	bta-miR-2284i
novel_circ_000318	bta-miR-2284t-5p
novel_circ_000318	bta-miR-2285b
novel_circ_000318	bta-miR-2317
novel_circ_000318	bta-miR-2322-3p
novel_circ_000318	bta-miR-2341
novel_circ_000318	bta-miR-2354
novel_circ_000318	bta-miR-2361
novel_circ_000318	bta-miR-2379
novel_circ_000318	bta-miR-2428
novel_circ_000318	bta-miR-2444
novel_circ_000318	bta-miR-2452
novel_circ_000318	bta-miR-2458
novel_circ_000318	bta-miR-2480
novel_circ_000318	bta-miR-27a-3p
novel_circ_000318	bta-miR-27b
novel_circ_000318	bta-miR-328
novel_circ_000318	bta-miR-449d
novel_circ_000318	bta-miR-484
novel_circ_000318	bta-miR-494
novel_circ_000318	bta-miR-543
novel_circ_000318	bta-miR-582
novel_circ_000318	bta-miR-664a
novel_circ_000319	bta-miR-1
novel_circ_000319	bta-miR-132
novel_circ_000319	bta-miR-182
novel_circ_000319	bta-miR-186
novel_circ_000319	bta-miR-194
novel_circ_000319	bta-miR-199c
novel_circ_000319	bta-miR-202
novel_circ_000319	bta-miR-206
novel_circ_000319	bta-miR-2284i
novel_circ_000319	bta-miR-2284t-5p
novel_circ_000319	bta-miR-2285b
novel_circ_000319	bta-miR-2317
novel_circ_000319	bta-miR-2322-3p
novel_circ_000319	bta-miR-2341
novel_circ_000319	bta-miR-2354
novel_circ_000319	bta-miR-2361
novel_circ_000319	bta-miR-2379
novel_circ_000319	bta-miR-2392
novel_circ_000319	bta-miR-2428
novel_circ_000319	bta-miR-2444
novel_circ_000319	bta-miR-2452
novel_circ_000319	bta-miR-2458
novel_circ_000319	bta-miR-2480
novel_circ_000319	bta-miR-27a-3p
novel_circ_000319	bta-miR-27b
novel_circ_000319	bta-miR-2891
novel_circ_000319	bta-miR-328
novel_circ_000319	bta-miR-449d
novel_circ_000319	bta-miR-484
novel_circ_000319	bta-miR-494
novel_circ_000319	bta-miR-543
novel_circ_000319	bta-miR-582
novel_circ_000319	bta-miR-6123
novel_circ_000319	bta-miR-664a
novel_circ_000327	bta-miR-2317
novel_circ_000327	bta-miR-2325b
novel_circ_000327	bta-miR-2329-3p
novel_circ_000327	bta-miR-2957
novel_circ_000327	bta-miR-326
novel_circ_000327	bta-miR-6122-5p
novel_circ_000329	bta-miR-135a
novel_circ_000329	bta-miR-18a
novel_circ_000329	bta-miR-18b
novel_circ_000329	bta-miR-2329-3p
novel_circ_000329	bta-miR-2364
novel_circ_000329	bta-miR-2397-5p
novel_circ_000329	bta-miR-2451
novel_circ_000329	bta-miR-6119-3p
novel_circ_000344	bta-miR-103
novel_circ_000344	bta-miR-107
novel_circ_000344	bta-miR-1301
novel_circ_000344	bta-miR-15a
novel_circ_000344	bta-miR-15b
novel_circ_000344	bta-miR-16a
novel_circ_000344	bta-miR-16b
novel_circ_000344	bta-miR-195
novel_circ_000344	bta-miR-216b
novel_circ_000344	bta-miR-2284h-5p
novel_circ_000344	bta-miR-2284k
novel_circ_000344	bta-miR-2284w
novel_circ_000344	bta-miR-2285w
novel_circ_000344	bta-miR-338
novel_circ_000344	bta-miR-376a
novel_circ_000344	bta-miR-376b
novel_circ_000344	bta-miR-376d
novel_circ_000344	bta-miR-424-5p
novel_circ_000344	bta-miR-497
novel_circ_000344	bta-miR-562
novel_circ_000352	bta-miR-1388-3p
novel_circ_000352	bta-miR-144
novel_circ_000352	bta-miR-1584-3p
novel_circ_000352	bta-miR-193a
novel_circ_000352	bta-miR-2284b
novel_circ_000352	bta-miR-2284d
novel_circ_000352	bta-miR-2284g
novel_circ_000352	bta-miR-2284j
novel_circ_000352	bta-miR-2284k
novel_circ_000352	bta-miR-2284m
novel_circ_000352	bta-miR-2284n
novel_circ_000352	bta-miR-2284u
novel_circ_000352	bta-miR-2284x
novel_circ_000352	bta-miR-2284y
novel_circ_000352	bta-miR-2285a
novel_circ_000352	bta-miR-2285t
novel_circ_000352	bta-miR-2293
novel_circ_000352	bta-miR-2352
novel_circ_000352	bta-miR-2370-5p
novel_circ_000352	bta-miR-2375
novel_circ_000352	bta-miR-2380
novel_circ_000352	bta-miR-23b-5p
novel_circ_000352	bta-miR-302b
novel_circ_000352	bta-miR-302c
novel_circ_000352	bta-miR-302d
novel_circ_000352	bta-miR-3533
novel_circ_000366	bta-miR-1842
novel_circ_000366	bta-miR-2420
novel_circ_000366	bta-miR-2464-5p
novel_circ_000366	bta-miR-2895
novel_circ_000366	bta-miR-370
novel_circ_000366	bta-miR-6523b
novel_circ_000368	bta-miR-101
novel_circ_000368	bta-miR-149-3p
novel_circ_000368	bta-miR-1842
novel_circ_000368	bta-miR-195
novel_circ_000368	bta-miR-197
novel_circ_000368	bta-miR-2370-3p
novel_circ_000368	bta-miR-2399-5p
novel_circ_000368	bta-miR-2416
novel_circ_000368	bta-miR-2420
novel_circ_000368	bta-miR-2464-3p
novel_circ_000368	bta-miR-2464-5p
novel_circ_000368	bta-miR-2477
novel_circ_000368	bta-miR-25
novel_circ_000368	bta-miR-28
novel_circ_000368	bta-miR-2895
novel_circ_000368	bta-miR-29e
novel_circ_000368	bta-miR-302a
novel_circ_000368	bta-miR-32
novel_circ_000368	bta-miR-345-3p
novel_circ_000368	bta-miR-3533
novel_circ_000368	bta-miR-370
novel_circ_000368	bta-miR-421
novel_circ_000368	bta-miR-424-5p
novel_circ_000368	bta-miR-545-5p
novel_circ_000368	bta-miR-6523b
novel_circ_000368	bta-miR-708
novel_circ_000375	bta-miR-224
novel_circ_000375	bta-miR-2284t-5p
novel_circ_000375	bta-miR-2319b
novel_circ_000375	bta-miR-2363
novel_circ_000375	bta-miR-2437
novel_circ_000375	bta-miR-2896
novel_circ_000375	bta-miR-2902
novel_circ_000375	bta-miR-29b
novel_circ_000375	bta-miR-29c
novel_circ_000375	bta-miR-29d-3p
novel_circ_000375	bta-miR-376c
novel_circ_000375	bta-miR-4523
novel_circ_000375	bta-miR-494
novel_circ_000380	bta-miR-1434-3p
novel_circ_000380	bta-miR-216b
novel_circ_000380	bta-miR-504
novel_circ_000383	bta-miR-1224
novel_circ_000383	bta-miR-15b
novel_circ_000383	bta-miR-16a
novel_circ_000383	bta-miR-16b
novel_circ_000383	bta-miR-195
novel_circ_000383	bta-miR-204
novel_circ_000383	bta-miR-211
novel_circ_000383	bta-miR-216b
novel_circ_000383	bta-miR-2331-5p
novel_circ_000383	bta-miR-2437
novel_circ_000383	bta-miR-2889
novel_circ_000383	bta-miR-338
novel_circ_000383	bta-miR-377
novel_circ_000383	bta-miR-497
novel_circ_000383	bta-miR-544b
novel_circ_000385	bta-miR-2393
novel_circ_000385	bta-miR-2404
novel_circ_000385	bta-miR-2439-5p
novel_circ_000385	bta-miR-2441
novel_circ_000385	bta-miR-2475
novel_circ_000385	bta-miR-29b
novel_circ_000385	bta-miR-29c
novel_circ_000385	bta-miR-29d-3p
novel_circ_000385	bta-miR-3533
novel_circ_000385	bta-miR-3600
novel_circ_000388	bta-miR-2404
novel_circ_000388	bta-miR-2439-5p
novel_circ_000388	bta-miR-2441
novel_circ_000388	bta-miR-2475
novel_circ_000388	bta-miR-345-3p
novel_circ_000388	bta-miR-3533
novel_circ_000389	bta-miR-1839
novel_circ_000389	bta-miR-205
novel_circ_000389	bta-miR-2285z
novel_circ_000389	bta-miR-2319a
novel_circ_000389	bta-miR-2399-5p
novel_circ_000389	bta-miR-376e
novel_circ_000389	bta-miR-631
novel_circ_000389	bta-miR-6524
novel_circ_000400	bta-miR-2285l
novel_circ_000400	bta-miR-2285n
novel_circ_000400	bta-miR-2314
novel_circ_000400	bta-miR-2434
novel_circ_000400	bta-miR-3120
novel_circ_000400	bta-miR-3602
novel_circ_000400	bta-miR-539
novel_circ_000405	bta-miR-1224
novel_circ_000405	bta-miR-1281
novel_circ_000405	bta-miR-129
novel_circ_000405	bta-miR-129-5p
novel_circ_000405	bta-miR-144
novel_circ_000405	bta-miR-193a
novel_circ_000405	bta-miR-200b
novel_circ_000405	bta-miR-200c
novel_circ_000405	bta-miR-2285j
novel_circ_000405	bta-miR-2303
novel_circ_000405	bta-miR-2325c
novel_circ_000405	bta-miR-2395
novel_circ_000405	bta-miR-2414
novel_circ_000405	bta-miR-2479
novel_circ_000405	bta-miR-3120
novel_circ_000405	bta-miR-33a
novel_circ_000405	bta-miR-33b
novel_circ_000405	bta-miR-429
novel_circ_000405	bta-miR-450b
novel_circ_000405	bta-miR-544a
novel_circ_000405	bta-miR-544b
novel_circ_000417	bta-miR-1343-3p
novel_circ_000417	bta-miR-17-3p
novel_circ_000417	bta-miR-2284b
novel_circ_000417	bta-miR-2284p
novel_circ_000417	bta-miR-2284u
novel_circ_000417	bta-miR-2284y
novel_circ_000417	bta-miR-2285ac
novel_circ_000417	bta-miR-2399-5p
novel_circ_000417	bta-miR-2464-5p
novel_circ_000417	bta-miR-326
novel_circ_000426	bta-miR-200a
novel_circ_000426	bta-miR-216a
novel_circ_000426	bta-miR-2315
novel_circ_000426	bta-miR-2452
novel_circ_000426	bta-miR-30b-3p
novel_circ_000426	bta-miR-338
novel_circ_000426	bta-miR-6527
novel_circ_000428	bta-miR-2355-3p
novel_circ_000428	bta-miR-2483-3p
novel_circ_000428	bta-miR-423-3p
novel_circ_000428	bta-miR-4657
novel_circ_000428	bta-miR-767
novel_circ_000431	bta-miR-2374
novel_circ_000431	bta-miR-2888
novel_circ_000438	bta-miR-181a
novel_circ_000438	bta-miR-181b
novel_circ_000438	bta-miR-181c
novel_circ_000438	bta-miR-181d
novel_circ_000438	bta-miR-216b
novel_circ_000438	bta-miR-2339
novel_circ_000438	bta-miR-448
novel_circ_000438	bta-miR-544b
novel_circ_000440	bta-miR-125a
novel_circ_000440	bta-miR-138
novel_circ_000440	bta-miR-2330-5p
novel_circ_000440	bta-miR-2350
novel_circ_000440	bta-miR-2898
novel_circ_000440	bta-miR-3064
novel_circ_000440	bta-miR-30b-3p
novel_circ_000440	bta-miR-338
novel_circ_000440	bta-miR-483
novel_circ_000440	bta-miR-615
novel_circ_000440	bta-miR-670
novel_circ_000443	bta-miR-2309
novel_circ_000443	bta-miR-2364
novel_circ_000443	bta-miR-2376
novel_circ_000443	bta-miR-2377
novel_circ_000443	bta-miR-302a
novel_circ_000443	bta-miR-483
novel_circ_000443	bta-miR-7691
novel_circ_000444	bta-miR-218
novel_circ_000444	bta-miR-2301
novel_circ_000444	bta-miR-2309
novel_circ_000444	bta-miR-2364
novel_circ_000444	bta-miR-2376
novel_circ_000444	bta-miR-2377
novel_circ_000444	bta-miR-2437
novel_circ_000444	bta-miR-2465
novel_circ_000444	bta-miR-296-5p
novel_circ_000444	bta-miR-302a
novel_circ_000444	bta-miR-483
novel_circ_000444	bta-miR-544a
novel_circ_000444	bta-miR-544b
novel_circ_000444	bta-miR-7691
novel_circ_000445	bta-miR-1306
novel_circ_000445	bta-miR-218
novel_circ_000445	bta-miR-22-3p
novel_circ_000445	bta-miR-2301
novel_circ_000445	bta-miR-2309
novel_circ_000445	bta-miR-2331-5p
novel_circ_000445	bta-miR-2364
novel_circ_000445	bta-miR-2376
novel_circ_000445	bta-miR-2377
novel_circ_000445	bta-miR-23a
novel_circ_000445	bta-miR-2430
novel_circ_000445	bta-miR-2437
novel_circ_000445	bta-miR-2465
novel_circ_000445	bta-miR-28
novel_circ_000445	bta-miR-296-5p
novel_circ_000445	bta-miR-302a
novel_circ_000445	bta-miR-339a
novel_circ_000445	bta-miR-483
novel_circ_000445	bta-miR-544a
novel_circ_000445	bta-miR-544b
novel_circ_000445	bta-miR-6520
novel_circ_000445	bta-miR-708
novel_circ_000445	bta-miR-7691
novel_circ_000447	bta-miR-2323
novel_circ_000447	bta-miR-2350
novel_circ_000447	bta-miR-2439-5p
novel_circ_000447	bta-miR-6523b
novel_circ_000468	bta-miR-196a
novel_circ_000468	bta-miR-196b
novel_circ_000468	bta-miR-2284ac
novel_circ_000468	bta-miR-2288
novel_circ_000468	bta-miR-2426
novel_circ_000468	bta-miR-2469
novel_circ_000468	bta-miR-2471-5p
novel_circ_000468	bta-miR-2894
novel_circ_000468	bta-miR-379
novel_circ_000468	bta-miR-500
novel_circ_000468	bta-miR-6536
novel_circ_000468	bta-miR-660
novel_circ_000483	bta-miR-1
novel_circ_000483	bta-miR-103
novel_circ_000483	bta-miR-107
novel_circ_000483	bta-miR-151-3p
novel_circ_000483	bta-miR-1814a
novel_circ_000483	bta-miR-1842
novel_circ_000483	bta-miR-206
novel_circ_000483	bta-miR-2304
novel_circ_000483	bta-miR-2357
novel_circ_000483	bta-miR-2405
novel_circ_000483	bta-miR-2454-3p
novel_circ_000483	bta-miR-2477
novel_circ_000483	bta-miR-2485
novel_circ_000483	bta-miR-326
novel_circ_000483	bta-miR-6120-5p
novel_circ_000483	bta-miR-677
novel_circ_000483	bta-miR-760-3p
novel_circ_000485	bta-miR-199a-5p
novel_circ_000485	bta-miR-2350
novel_circ_000485	bta-miR-2448-3p
novel_circ_000486	bta-miR-1584-3p
novel_circ_000486	bta-miR-199a-5p
novel_circ_000486	bta-miR-216b
novel_circ_000486	bta-miR-2350
novel_circ_000486	bta-miR-2448-3p
novel_circ_000486	bta-miR-4680
novel_circ_000490	bta-miR-216a
novel_circ_000490	bta-miR-2337
novel_circ_000490	bta-miR-2371
novel_circ_000490	bta-miR-2902
novel_circ_000490	bta-miR-433
novel_circ_000490	bta-miR-6123
novel_circ_000490	bta-miR-6529a
novel_circ_000496	bta-miR-1
novel_circ_000496	bta-miR-136
novel_circ_000496	bta-miR-141
novel_circ_000496	bta-miR-145
novel_circ_000496	bta-miR-155
novel_circ_000496	bta-miR-206
novel_circ_000496	bta-miR-21-3p
novel_circ_000496	bta-miR-2284d
novel_circ_000496	bta-miR-2284k
novel_circ_000496	bta-miR-2284l
novel_circ_000496	bta-miR-2284n
novel_circ_000496	bta-miR-2285j
novel_circ_000496	bta-miR-2301
novel_circ_000496	bta-miR-2320-5p
novel_circ_000496	bta-miR-2337
novel_circ_000496	bta-miR-2375
novel_circ_000496	bta-miR-2437
novel_circ_000496	bta-miR-2443
novel_circ_000496	bta-miR-2468
novel_circ_000496	bta-miR-2471-3p
novel_circ_000496	bta-miR-2477
novel_circ_000496	bta-miR-2486-3p
novel_circ_000496	bta-miR-361
novel_circ_000496	bta-miR-483
novel_circ_000496	bta-miR-584
novel_circ_000496	bta-miR-653
novel_circ_000496	bta-miR-6535
novel_circ_000498	bta-miR-145
novel_circ_000498	bta-miR-155
novel_circ_000498	bta-miR-2285j
novel_circ_000498	bta-miR-2301
novel_circ_000498	bta-miR-2375
novel_circ_000498	bta-miR-584
novel_circ_000498	bta-miR-653
novel_circ_000499	bta-miR-145
novel_circ_000499	bta-miR-2285j
novel_circ_000499	bta-miR-2375
novel_circ_000499	bta-miR-653
novel_circ_000537	bta-miR-142-3p
novel_circ_000537	bta-miR-224
novel_circ_000537	bta-miR-2376
novel_circ_000537	bta-miR-2428
novel_circ_000537	bta-miR-2461-3p
novel_circ_000537	bta-miR-34a
novel_circ_000537	bta-miR-34b
novel_circ_000537	bta-miR-34c
novel_circ_000537	bta-miR-3660
novel_circ_000537	bta-miR-449a
novel_circ_000537	bta-miR-449b
novel_circ_000537	bta-miR-449c
novel_circ_000537	bta-miR-449d
novel_circ_000537	bta-miR-759
novel_circ_000552	bta-miR-224
novel_circ_000552	bta-miR-2285q
novel_circ_000552	bta-miR-2292
novel_circ_000552	bta-miR-2469
novel_circ_000552	bta-miR-2488
novel_circ_000552	bta-miR-411c-3p
novel_circ_000552	bta-miR-421
novel_circ_000552	bta-miR-484
novel_circ_000552	bta-miR-6122-5p
novel_circ_000552	bta-miR-6531
novel_circ_000577	bta-miR-124a
novel_circ_000577	bta-miR-124b
novel_circ_000577	bta-miR-128
novel_circ_000577	bta-miR-1301
novel_circ_000577	bta-miR-130a
novel_circ_000577	bta-miR-130b
novel_circ_000577	bta-miR-148a
novel_circ_000577	bta-miR-148b
novel_circ_000577	bta-miR-149-5p
novel_circ_000577	bta-miR-1777a
novel_circ_000577	bta-miR-1839
novel_circ_000577	bta-miR-18a
novel_circ_000577	bta-miR-18b
novel_circ_000577	bta-miR-197
novel_circ_000577	bta-miR-204
novel_circ_000577	bta-miR-216a
novel_circ_000577	bta-miR-2284aa
novel_circ_000577	bta-miR-2284c
novel_circ_000577	bta-miR-2284h-3p
novel_circ_000577	bta-miR-2284j
novel_circ_000577	bta-miR-2284k
novel_circ_000577	bta-miR-2284m
novel_circ_000577	bta-miR-2284n
novel_circ_000577	bta-miR-2284v
novel_circ_000577	bta-miR-2284z
novel_circ_000577	bta-miR-2286
novel_circ_000577	bta-miR-2289
novel_circ_000577	bta-miR-2327
novel_circ_000577	bta-miR-2363
novel_circ_000577	bta-miR-2378
novel_circ_000577	bta-miR-2379
novel_circ_000577	bta-miR-2380
novel_circ_000577	bta-miR-2384
novel_circ_000577	bta-miR-2397-3p
novel_circ_000577	bta-miR-2430
novel_circ_000577	bta-miR-2433
novel_circ_000577	bta-miR-2452
novel_circ_000577	bta-miR-2453
novel_circ_000577	bta-miR-2471-3p
novel_circ_000577	bta-miR-2478
novel_circ_000577	bta-miR-27a-3p
novel_circ_000577	bta-miR-27b
novel_circ_000577	bta-miR-296-5p
novel_circ_000577	bta-miR-302a
novel_circ_000577	bta-miR-3064
novel_circ_000577	bta-miR-320a
novel_circ_000577	bta-miR-326
novel_circ_000577	bta-miR-3600
novel_circ_000577	bta-miR-3660
novel_circ_000577	bta-miR-376a
novel_circ_000577	bta-miR-376b
novel_circ_000577	bta-miR-376d
novel_circ_000577	bta-miR-376e
novel_circ_000577	bta-miR-454
novel_circ_000577	bta-miR-503-3p
novel_circ_000577	bta-miR-544a
novel_circ_000577	bta-miR-544b
novel_circ_000577	bta-miR-562
novel_circ_000577	bta-miR-592
novel_circ_000577	bta-miR-599
novel_circ_000577	bta-miR-6520
novel_circ_000577	bta-miR-6531
novel_circ_000577	bta-miR-6535
novel_circ_000577	bta-miR-7
novel_circ_000577	bta-miR-769
novel_circ_000581	bta-miR-2285aa
novel_circ_000581	bta-miR-2285t
novel_circ_000581	bta-miR-2422
novel_circ_000581	bta-miR-2890
novel_circ_000602	bta-miR-152
novel_circ_000602	bta-miR-2285aa
novel_circ_000602	bta-miR-2307
novel_circ_000602	bta-miR-320b
novel_circ_000604	bta-miR-2284ac
novel_circ_000604	bta-miR-2285q
novel_circ_000604	bta-miR-2917
novel_circ_000604	bta-miR-3120
novel_circ_000604	bta-miR-539
novel_circ_000604	bta-miR-664a
novel_circ_000613	bta-miR-1291
novel_circ_000613	bta-miR-182
novel_circ_000613	bta-miR-216b
novel_circ_000613	bta-miR-22-3p
novel_circ_000613	bta-miR-2310
novel_circ_000613	bta-miR-2330-5p
novel_circ_000613	bta-miR-2358
novel_circ_000613	bta-miR-2399-5p
novel_circ_000613	bta-miR-2883
novel_circ_000613	bta-miR-2894
novel_circ_000613	bta-miR-320a
novel_circ_000613	bta-miR-545-3p
novel_circ_000620	bta-miR-125a
novel_circ_000620	bta-miR-125b
novel_circ_000620	bta-miR-1301
novel_circ_000620	bta-miR-130a
novel_circ_000620	bta-miR-130b
novel_circ_000620	bta-miR-1388-3p
novel_circ_000620	bta-miR-153
novel_circ_000620	bta-miR-1814a
novel_circ_000620	bta-miR-18a
novel_circ_000620	bta-miR-18b
novel_circ_000620	bta-miR-199c
novel_circ_000620	bta-miR-200c
novel_circ_000620	bta-miR-2285ad
novel_circ_000620	bta-miR-2285af
novel_circ_000620	bta-miR-2311
novel_circ_000620	bta-miR-2362
novel_circ_000620	bta-miR-2368-5p
novel_circ_000620	bta-miR-2380
novel_circ_000620	bta-miR-2457
novel_circ_000620	bta-miR-2489
novel_circ_000620	bta-miR-28
novel_circ_000620	bta-miR-2917
novel_circ_000620	bta-miR-29a
novel_circ_000620	bta-miR-29b
novel_circ_000620	bta-miR-29c
novel_circ_000620	bta-miR-29d-3p
novel_circ_000620	bta-miR-323
novel_circ_000620	bta-miR-454
novel_circ_000620	bta-miR-495
novel_circ_000620	bta-miR-539
novel_circ_000620	bta-miR-568
novel_circ_000620	bta-miR-6122-3p
novel_circ_000620	bta-miR-655
novel_circ_000620	bta-miR-670
novel_circ_000620	bta-miR-708
novel_circ_000637	bta-miR-30a-5p
novel_circ_000637	bta-miR-30b-5p
novel_circ_000637	bta-miR-30c
novel_circ_000637	bta-miR-30d
novel_circ_000637	bta-miR-30e-5p
novel_circ_000637	bta-miR-30f
novel_circ_000637	bta-miR-3533
novel_circ_000637	bta-miR-450b
novel_circ_000637	bta-miR-4680
novel_circ_000637	bta-miR-6518
novel_circ_000639	bta-miR-1388-5p
novel_circ_000639	bta-miR-22-5p
novel_circ_000639	bta-miR-2464-3p
novel_circ_000639	bta-miR-2464-5p
novel_circ_000640	bta-miR-103
novel_circ_000640	bta-miR-107
novel_circ_000640	bta-miR-1388-5p
novel_circ_000640	bta-miR-21-5p
novel_circ_000640	bta-miR-22-5p
novel_circ_000640	bta-miR-2306
novel_circ_000640	bta-miR-2464-3p
novel_circ_000640	bta-miR-2464-5p
novel_circ_000647	bta-miR-139
novel_circ_000647	bta-miR-224
novel_circ_000647	bta-miR-2406
novel_circ_000647	bta-miR-2485
novel_circ_000647	bta-miR-29d-3p
novel_circ_000647	bta-miR-362-5p
novel_circ_000647	bta-miR-6119-5p
novel_circ_000647	bta-miR-6528
novel_circ_000651	bta-miR-302a
novel_circ_000651	bta-miR-302b
novel_circ_000651	bta-miR-340
novel_circ_000651	bta-miR-448
novel_circ_000652	bta-miR-146a
novel_circ_000652	bta-miR-146b
novel_circ_000652	bta-miR-154a
novel_circ_000652	bta-miR-155
novel_circ_000652	bta-miR-217
novel_circ_000652	bta-miR-2399-5p
novel_circ_000652	bta-miR-6518
novel_circ_000652	bta-miR-664b
novel_circ_000659	bta-miR-21-3p
novel_circ_000659	bta-miR-2285h
novel_circ_000659	bta-miR-2370-3p
novel_circ_000659	bta-miR-2397-3p
novel_circ_000659	bta-miR-23a
novel_circ_000659	bta-miR-23b-3p
novel_circ_000659	bta-miR-2409
novel_circ_000659	bta-miR-2431-5p
novel_circ_000659	bta-miR-2450a
novel_circ_000659	bta-miR-2478
novel_circ_000659	bta-miR-345-3p
novel_circ_000659	bta-miR-3660
novel_circ_000659	bta-miR-382
novel_circ_000663	bta-miR-1256
novel_circ_000663	bta-miR-149-3p
novel_circ_000663	bta-miR-193a
novel_circ_000663	bta-miR-2284q
novel_circ_000663	bta-miR-361
novel_circ_000668	bta-miR-148a
novel_circ_000668	bta-miR-148b
novel_circ_000668	bta-miR-152
novel_circ_000668	bta-miR-2285z
novel_circ_000668	bta-miR-33a
novel_circ_000668	bta-miR-33b
novel_circ_000668	bta-miR-3431
novel_circ_000668	bta-miR-34a
novel_circ_000668	bta-miR-34b
novel_circ_000668	bta-miR-34c
novel_circ_000668	bta-miR-449c
novel_circ_000668	bta-miR-495
novel_circ_000668	bta-miR-6520
novel_circ_000670	bta-miR-135a
novel_circ_000670	bta-miR-135b
novel_circ_000670	bta-miR-148a
novel_circ_000670	bta-miR-148b
novel_circ_000670	bta-miR-214
novel_circ_000670	bta-miR-2284i
novel_circ_000670	bta-miR-2285z
novel_circ_000670	bta-miR-2367-5p
novel_circ_000670	bta-miR-2917
novel_circ_000670	bta-miR-33a
novel_circ_000670	bta-miR-33b
novel_circ_000670	bta-miR-3431
novel_circ_000670	bta-miR-34a
novel_circ_000670	bta-miR-34b
novel_circ_000670	bta-miR-34c
novel_circ_000670	bta-miR-410
novel_circ_000670	bta-miR-449c
novel_circ_000670	bta-miR-495
novel_circ_000670	bta-miR-6520
novel_circ_000670	bta-miR-761
novel_circ_000681	bta-miR-1277
novel_circ_000681	bta-miR-1814c
novel_circ_000681	bta-miR-184
novel_circ_000681	bta-miR-216b
novel_circ_000681	bta-miR-2362
novel_circ_000681	bta-miR-2377
novel_circ_000681	bta-miR-2395
novel_circ_000681	bta-miR-2461-3p
novel_circ_000681	bta-miR-2466-5p
novel_circ_000681	bta-miR-2891
novel_circ_000681	bta-miR-2957
novel_circ_000681	bta-miR-423-3p
novel_circ_000681	bta-miR-758
novel_circ_000681	bta-miR-759
novel_circ_000681	bta-miR-763
novel_circ_000689	bta-miR-1281
novel_circ_000689	bta-miR-1306
novel_circ_000689	bta-miR-147
novel_circ_000689	bta-miR-194
novel_circ_000689	bta-miR-2284t-3p
novel_circ_000689	bta-miR-2288
novel_circ_000689	bta-miR-2348
novel_circ_000689	bta-miR-2435
novel_circ_000689	bta-miR-2451
novel_circ_000689	bta-miR-2897
novel_circ_000689	bta-miR-30b-3p
novel_circ_000689	bta-miR-329b
novel_circ_000689	bta-miR-365-3p
novel_circ_000689	bta-miR-432
novel_circ_000689	bta-miR-584
novel_circ_000692	bta-miR-17-3p
novel_circ_000692	bta-miR-181a
novel_circ_000692	bta-miR-181b
novel_circ_000692	bta-miR-181d
novel_circ_000692	bta-miR-2299-5p
novel_circ_000692	bta-miR-2313-3p
novel_circ_000692	bta-miR-2464-3p
novel_circ_000692	bta-miR-2895
novel_circ_000692	bta-miR-370
novel_circ_000694	bta-miR-103
novel_circ_000694	bta-miR-107
novel_circ_000694	bta-miR-15a
novel_circ_000694	bta-miR-15b
novel_circ_000694	bta-miR-16b
novel_circ_000694	bta-miR-2317
novel_circ_000694	bta-miR-2320-3p
novel_circ_000694	bta-miR-2329-3p
novel_circ_000694	bta-miR-29b
novel_circ_000694	bta-miR-29d-3p
novel_circ_000694	bta-miR-3064
novel_circ_000694	bta-miR-424-5p
novel_circ_000694	bta-miR-497
novel_circ_000714	bta-miR-1
novel_circ_000714	bta-miR-1814c
novel_circ_000714	bta-miR-206
novel_circ_000714	bta-miR-218
novel_circ_000714	bta-miR-2285c
novel_circ_000714	bta-miR-2285e
novel_circ_000714	bta-miR-2285g
novel_circ_000714	bta-miR-2310
novel_circ_000714	bta-miR-2384
novel_circ_000714	bta-miR-2461-3p
novel_circ_000714	bta-miR-2471-5p
novel_circ_000714	bta-miR-2917
novel_circ_000714	bta-miR-3660
novel_circ_000714	bta-miR-378d
novel_circ_000714	bta-miR-655
novel_circ_000714	bta-miR-759
novel_circ_000723	bta-miR-200c
novel_circ_000723	bta-miR-214
novel_circ_000723	bta-miR-22-3p
novel_circ_000723	bta-miR-2284s
novel_circ_000723	bta-miR-2454-5p
novel_circ_000723	bta-miR-29b
novel_circ_000723	bta-miR-29c
novel_circ_000723	bta-miR-29d-3p
novel_circ_000723	bta-miR-761
novel_circ_000725	bta-miR-145
novel_circ_000725	bta-miR-1603
novel_circ_000725	bta-miR-2285q
novel_circ_000725	bta-miR-2317
novel_circ_000725	bta-miR-2486-3p
novel_circ_000725	bta-miR-25
novel_circ_000725	bta-miR-6120-5p
novel_circ_000736	bta-miR-2330-3p
novel_circ_000736	bta-miR-2468
novel_circ_000737	bta-miR-124a
novel_circ_000737	bta-miR-124b
novel_circ_000737	bta-miR-2293
novel_circ_000737	bta-miR-2301
novel_circ_000737	bta-miR-2315
novel_circ_000737	bta-miR-2326
novel_circ_000737	bta-miR-2330-5p
novel_circ_000737	bta-miR-2331-3p
novel_circ_000737	bta-miR-409b
novel_circ_000737	bta-miR-6531
novel_circ_000737	bta-miR-7691
novel_circ_000745	bta-miR-1584-5p
novel_circ_000745	bta-miR-212
novel_circ_000745	bta-miR-223
novel_circ_000745	bta-miR-2285af
novel_circ_000745	bta-miR-2285z
novel_circ_000745	bta-miR-2374
novel_circ_000745	bta-miR-24-3p
novel_circ_000745	bta-miR-2412
novel_circ_000745	bta-miR-2486-3p
novel_circ_000745	bta-miR-2957
novel_circ_000745	bta-miR-3578
novel_circ_000745	bta-miR-423-5p
novel_circ_000745	bta-miR-532
novel_circ_000750	bta-miR-1301
novel_circ_000750	bta-miR-193a
novel_circ_000750	bta-miR-22-3p
novel_circ_000750	bta-miR-221
novel_circ_000750	bta-miR-222
novel_circ_000750	bta-miR-2297
novel_circ_000750	bta-miR-2365
novel_circ_000750	bta-miR-2393
novel_circ_000750	bta-miR-367
novel_circ_000750	bta-miR-4680
novel_circ_000753	bta-miR-493
novel_circ_000756	bta-miR-155
novel_circ_000756	bta-miR-199a-5p
novel_circ_000756	bta-miR-199b
novel_circ_000756	bta-miR-19b
novel_circ_000756	bta-miR-205
novel_circ_000756	bta-miR-2362
novel_circ_000756	bta-miR-2434
novel_circ_000756	bta-miR-2452
novel_circ_000756	bta-miR-2883
novel_circ_000756	bta-miR-3602
novel_circ_000756	bta-miR-484
novel_circ_000763	bta-miR-6120-5p
novel_circ_000763	bta-miR-6122-5p
novel_circ_000764	bta-miR-2881
novel_circ_000764	bta-miR-423-5p
novel_circ_000764	bta-miR-544b
novel_circ_000764	bta-miR-628
novel_circ_000772	bta-miR-145
novel_circ_000772	bta-miR-1843
novel_circ_000772	bta-miR-2397-3p
novel_circ_000772	bta-miR-2448-3p
novel_circ_000772	bta-miR-335
novel_circ_000772	bta-miR-338
novel_circ_000772	bta-miR-503-5p
novel_circ_000772	bta-miR-6518
novel_circ_000772	bta-miR-6519
novel_circ_000785	bta-miR-101
novel_circ_000785	bta-miR-138
novel_circ_000785	bta-miR-200c
novel_circ_000785	bta-miR-2284ac
novel_circ_000785	bta-miR-2350
novel_circ_000785	bta-miR-2399-3p
novel_circ_000785	bta-miR-2406
novel_circ_000785	bta-miR-2464-3p
novel_circ_000785	bta-miR-2489
novel_circ_000785	bta-miR-3064
novel_circ_000785	bta-miR-500
novel_circ_000785	bta-miR-6120-5p
novel_circ_000785	bta-miR-759
novel_circ_000787	bta-miR-138
novel_circ_000787	bta-miR-142-3p
novel_circ_000787	bta-miR-2350
novel_circ_000787	bta-miR-2406
novel_circ_000787	bta-miR-2489
novel_circ_000787	bta-miR-500
novel_circ_000787	bta-miR-759
novel_circ_000790	bta-miR-125b
novel_circ_000790	bta-miR-135a
novel_circ_000790	bta-miR-135b
novel_circ_000790	bta-miR-145
novel_circ_000790	bta-miR-148a
novel_circ_000790	bta-miR-148b
novel_circ_000790	bta-miR-152
novel_circ_000790	bta-miR-15a
novel_circ_000790	bta-miR-15b
novel_circ_000790	bta-miR-16a
novel_circ_000790	bta-miR-16b
novel_circ_000790	bta-miR-195
novel_circ_000790	bta-miR-205
novel_circ_000790	bta-miR-2285c
novel_circ_000790	bta-miR-2285d
novel_circ_000790	bta-miR-2285j
novel_circ_000790	bta-miR-2313-3p
novel_circ_000790	bta-miR-2326
novel_circ_000790	bta-miR-2329-3p
novel_circ_000790	bta-miR-2334
novel_circ_000790	bta-miR-2346
novel_circ_000790	bta-miR-2439-3p
novel_circ_000790	bta-miR-2446
novel_circ_000790	bta-miR-2465
novel_circ_000790	bta-miR-2891
novel_circ_000790	bta-miR-2895
novel_circ_000790	bta-miR-367
novel_circ_000790	bta-miR-424-5p
novel_circ_000790	bta-miR-450b
novel_circ_000790	bta-miR-497
novel_circ_000790	bta-miR-562
novel_circ_000790	bta-miR-582
novel_circ_000790	bta-miR-6122-5p
novel_circ_000790	bta-miR-670
novel_circ_000795	bta-miR-205
novel_circ_000795	bta-miR-210
novel_circ_000795	bta-miR-2293
novel_circ_000795	bta-miR-2362
novel_circ_000795	bta-miR-2432
novel_circ_000795	bta-miR-2471-5p
novel_circ_000797	bta-miR-129
novel_circ_000797	bta-miR-129-5p
novel_circ_000797	bta-miR-132
novel_circ_000797	bta-miR-148a
novel_circ_000797	bta-miR-148b
novel_circ_000797	bta-miR-152
novel_circ_000797	bta-miR-2284aa
novel_circ_000797	bta-miR-2284w
novel_circ_000797	bta-miR-2284z
novel_circ_000797	bta-miR-2373-5p
novel_circ_000797	bta-miR-23b-5p
novel_circ_000797	bta-miR-2404
novel_circ_000797	bta-miR-2425-3p
novel_circ_000797	bta-miR-2457
novel_circ_000797	bta-miR-381
novel_circ_000797	bta-miR-421
novel_circ_000797	bta-miR-544a
novel_circ_000797	bta-miR-544b
novel_circ_000797	bta-miR-6122-5p
novel_circ_000803	bta-miR-205
novel_circ_000803	bta-miR-2294
novel_circ_000803	bta-miR-2363
novel_circ_000803	bta-miR-3957
novel_circ_000803	bta-miR-500
novel_circ_000803	bta-miR-6531
novel_circ_000803	bta-miR-763
novel_circ_000819	bta-let-7a-5p
novel_circ_000819	bta-let-7b
novel_circ_000819	bta-let-7c
novel_circ_000819	bta-let-7d
novel_circ_000819	bta-let-7g
novel_circ_000819	bta-miR-1277
novel_circ_000819	bta-miR-149-5p
novel_circ_000819	bta-miR-154b
novel_circ_000819	bta-miR-205
novel_circ_000819	bta-miR-2285b
novel_circ_000819	bta-miR-2367-3p
novel_circ_000819	bta-miR-2376
novel_circ_000819	bta-miR-2432
novel_circ_000819	bta-miR-2451
novel_circ_000819	bta-miR-2461-5p
novel_circ_000819	bta-miR-2466-5p
novel_circ_000819	bta-miR-302b
novel_circ_000819	bta-miR-302c
novel_circ_000819	bta-miR-302d
novel_circ_000819	bta-miR-425-5p
novel_circ_000819	bta-miR-488
novel_circ_000819	bta-miR-6517
novel_circ_000819	bta-miR-664a
novel_circ_000819	bta-miR-708
novel_circ_000823	bta-miR-155
novel_circ_000823	bta-miR-1584-3p
novel_circ_000823	bta-miR-15b
novel_circ_000823	bta-miR-16a
novel_circ_000823	bta-miR-16b
novel_circ_000823	bta-miR-195
novel_circ_000823	bta-miR-223
novel_circ_000823	bta-miR-2285x
novel_circ_000823	bta-miR-2338
novel_circ_000823	bta-miR-2370-5p
novel_circ_000823	bta-miR-2394
novel_circ_000823	bta-miR-2409
novel_circ_000823	bta-miR-2431-5p
novel_circ_000823	bta-miR-2458
novel_circ_000823	bta-miR-29b
novel_circ_000823	bta-miR-29c
novel_circ_000823	bta-miR-29d-3p
novel_circ_000823	bta-miR-365-3p
novel_circ_000823	bta-miR-380-5p
novel_circ_000823	bta-miR-455-5p
novel_circ_000823	bta-miR-485
novel_circ_000823	bta-miR-499
novel_circ_000823	bta-miR-6121-3p
novel_circ_000824	bta-miR-140
novel_circ_000824	bta-miR-155
novel_circ_000824	bta-miR-1584-3p
novel_circ_000824	bta-miR-15b
novel_circ_000824	bta-miR-16a
novel_circ_000824	bta-miR-16b
novel_circ_000824	bta-miR-195
novel_circ_000824	bta-miR-21-3p
novel_circ_000824	bta-miR-223
novel_circ_000824	bta-miR-2285x
novel_circ_000824	bta-miR-2301
novel_circ_000824	bta-miR-2334
novel_circ_000824	bta-miR-2338
novel_circ_000824	bta-miR-2370-5p
novel_circ_000824	bta-miR-2394
novel_circ_000824	bta-miR-2409
novel_circ_000824	bta-miR-2431-5p
novel_circ_000824	bta-miR-2458
novel_circ_000824	bta-miR-29b
novel_circ_000824	bta-miR-29c
novel_circ_000824	bta-miR-29d-3p
novel_circ_000824	bta-miR-365-3p
novel_circ_000824	bta-miR-377
novel_circ_000824	bta-miR-380-5p
novel_circ_000824	bta-miR-455-5p
novel_circ_000824	bta-miR-485
novel_circ_000824	bta-miR-499
novel_circ_000824	bta-miR-503-5p
novel_circ_000824	bta-miR-6121-3p
novel_circ_000824	bta-miR-6519
novel_circ_000824	bta-miR-6526
novel_circ_000826	bta-miR-103
novel_circ_000826	bta-miR-107
novel_circ_000826	bta-miR-1179
novel_circ_000826	bta-miR-133c
novel_circ_000826	bta-miR-15a
novel_circ_000826	bta-miR-15b
novel_circ_000826	bta-miR-19a
novel_circ_000826	bta-miR-19b
novel_circ_000826	bta-miR-2284w
novel_circ_000826	bta-miR-2285o
novel_circ_000826	bta-miR-2349
novel_circ_000826	bta-miR-2399-3p
novel_circ_000826	bta-miR-2407
novel_circ_000826	bta-miR-2424
novel_circ_000826	bta-miR-2448-3p
novel_circ_000826	bta-miR-2450b
novel_circ_000826	bta-miR-2452
novel_circ_000826	bta-miR-2454-5p
novel_circ_000826	bta-miR-2477
novel_circ_000826	bta-miR-2885
novel_circ_000826	bta-miR-338
novel_circ_000826	bta-miR-3613a
novel_circ_000826	bta-miR-370
novel_circ_000826	bta-miR-424-5p
novel_circ_000826	bta-miR-429
novel_circ_000826	bta-miR-453
novel_circ_000826	bta-miR-485
novel_circ_000829	bta-miR-2285g
novel_circ_000829	bta-miR-2337
novel_circ_000829	bta-miR-2350
novel_circ_000829	bta-miR-2424
novel_circ_000829	bta-miR-2437
novel_circ_000829	bta-miR-2483-3p
novel_circ_000829	bta-miR-326
novel_circ_000829	bta-miR-545-5p
novel_circ_000829	bta-miR-653
novel_circ_000829	bta-miR-664a
novel_circ_000830	bta-miR-145
novel_circ_000830	bta-miR-2284r
novel_circ_000830	bta-miR-2284s
novel_circ_000830	bta-miR-2309
novel_circ_000830	bta-miR-2443
novel_circ_000830	bta-miR-320b
novel_circ_000830	bta-miR-4680
novel_circ_000845	bta-let-7a-3p
novel_circ_000845	bta-miR-129
novel_circ_000845	bta-miR-129-5p
novel_circ_000845	bta-miR-141
novel_circ_000845	bta-miR-1814a
novel_circ_000845	bta-miR-2469
novel_circ_000850	bta-miR-1584-3p
novel_circ_000850	bta-miR-2367-3p
novel_circ_000850	bta-miR-2448-3p
novel_circ_000850	bta-miR-2466-5p
novel_circ_000850	bta-miR-29e
novel_circ_000850	bta-miR-338
novel_circ_000850	bta-miR-432
novel_circ_000850	bta-miR-488
novel_circ_000850	bta-miR-545-5p
novel_circ_000860	bta-miR-1842
novel_circ_000860	bta-miR-2284i
novel_circ_000860	bta-miR-2284p
novel_circ_000860	bta-miR-2284y
novel_circ_000860	bta-miR-2314
novel_circ_000860	bta-miR-484
novel_circ_000860	bta-miR-653
novel_circ_000860	bta-miR-760-3p
novel_circ_000867	bta-miR-1
novel_circ_000867	bta-miR-105a
novel_circ_000867	bta-miR-129
novel_circ_000867	bta-miR-129-5p
novel_circ_000867	bta-miR-136
novel_circ_000867	bta-miR-1584-3p
novel_circ_000867	bta-miR-1584-5p
novel_circ_000867	bta-miR-1839
novel_circ_000867	bta-miR-206
novel_circ_000867	bta-miR-216a
novel_circ_000867	bta-miR-217
novel_circ_000867	bta-miR-2285ab
novel_circ_000867	bta-miR-2285f
novel_circ_000867	bta-miR-2294
novel_circ_000867	bta-miR-2320-3p
novel_circ_000867	bta-miR-2412
novel_circ_000867	bta-miR-2454-3p
novel_circ_000867	bta-miR-2477
novel_circ_000867	bta-miR-2489
novel_circ_000867	bta-miR-27a-5p
novel_circ_000867	bta-miR-421
novel_circ_000867	bta-miR-490
novel_circ_000867	bta-miR-503-5p
novel_circ_000867	bta-miR-6519
novel_circ_000867	bta-miR-6536
novel_circ_000875	bta-let-7b
novel_circ_000875	bta-let-7f
novel_circ_000875	bta-let-7g
novel_circ_000875	bta-let-7i
novel_circ_000875	bta-miR-1287
novel_circ_000875	bta-miR-1434-5p
novel_circ_000875	bta-miR-154b
novel_circ_000875	bta-miR-17-3p
novel_circ_000875	bta-miR-190b
novel_circ_000875	bta-miR-2385-3p
novel_circ_000875	bta-miR-3154
novel_circ_000875	bta-miR-324
novel_circ_000875	bta-miR-362-5p
novel_circ_000885	bta-miR-1
novel_circ_000885	bta-miR-144
novel_circ_000885	bta-miR-181a
novel_circ_000885	bta-miR-181b
novel_circ_000885	bta-miR-181c
novel_circ_000885	bta-miR-186
novel_circ_000885	bta-miR-204
novel_circ_000885	bta-miR-211
novel_circ_000885	bta-miR-217
novel_circ_000885	bta-miR-2413
novel_circ_000885	bta-miR-2449
novel_circ_000885	bta-miR-2895
novel_circ_000885	bta-miR-339a
novel_circ_000885	bta-miR-339b
novel_circ_000885	bta-miR-3578
novel_circ_000885	bta-miR-448
novel_circ_000885	bta-miR-539
novel_circ_000885	bta-miR-544b
novel_circ_000885	bta-miR-660
novel_circ_000890	bta-miR-103
novel_circ_000890	bta-miR-107
novel_circ_000890	bta-miR-2313-3p
novel_circ_000890	bta-miR-34b
novel_circ_000890	bta-miR-34c
novel_circ_000890	bta-miR-424-5p
novel_circ_000890	bta-miR-449a
novel_circ_000890	bta-miR-449b
novel_circ_000890	bta-miR-562
novel_circ_000892	bta-miR-137
novel_circ_000892	bta-miR-2285a
novel_circ_000892	bta-miR-544a
novel_circ_000892	bta-miR-544b
novel_circ_000899	bta-miR-2339
novel_circ_000899	bta-miR-2373-3p
novel_circ_000899	bta-miR-2375
novel_circ_000899	bta-miR-2380
novel_circ_000899	bta-miR-2464-5p
novel_circ_000899	bta-miR-2894
novel_circ_000899	bta-miR-2898
novel_circ_000899	bta-miR-296-5p
novel_circ_000901	bta-miR-133a
novel_circ_000901	bta-miR-133b
novel_circ_000901	bta-miR-200c
novel_circ_000901	bta-miR-2284a
novel_circ_000901	bta-miR-2284b
novel_circ_000901	bta-miR-2284u
novel_circ_000901	bta-miR-2284y
novel_circ_000901	bta-miR-2285j
novel_circ_000901	bta-miR-2294
novel_circ_000901	bta-miR-2311
novel_circ_000901	bta-miR-2313-3p
novel_circ_000901	bta-miR-2329-5p
novel_circ_000901	bta-miR-2434
novel_circ_000901	bta-miR-27a-5p
novel_circ_000901	bta-miR-376e
novel_circ_000901	bta-miR-493
novel_circ_000901	bta-miR-543
novel_circ_000901	bta-miR-677
novel_circ_000903	bta-miR-133a
novel_circ_000903	bta-miR-133b
novel_circ_000903	bta-miR-200c
novel_circ_000903	bta-miR-2284a
novel_circ_000903	bta-miR-2284b
novel_circ_000903	bta-miR-2284u
novel_circ_000903	bta-miR-2284y
novel_circ_000903	bta-miR-2285j
novel_circ_000903	bta-miR-2294
novel_circ_000903	bta-miR-2311
novel_circ_000903	bta-miR-2329-5p
novel_circ_000903	bta-miR-2434
novel_circ_000903	bta-miR-27a-5p
novel_circ_000903	bta-miR-376e
novel_circ_000903	bta-miR-493
novel_circ_000903	bta-miR-543
novel_circ_000903	bta-miR-677
novel_circ_000904	bta-miR-1301
novel_circ_000904	bta-miR-1603
novel_circ_000904	bta-miR-200c
novel_circ_000904	bta-miR-2284a
novel_circ_000904	bta-miR-2284b
novel_circ_000904	bta-miR-2284u
novel_circ_000904	bta-miR-2284y
novel_circ_000904	bta-miR-2285j
novel_circ_000904	bta-miR-2294
novel_circ_000904	bta-miR-2311
novel_circ_000904	bta-miR-2322-5p
novel_circ_000904	bta-miR-2326
novel_circ_000904	bta-miR-2329-5p
novel_circ_000904	bta-miR-2384
novel_circ_000904	bta-miR-2408
novel_circ_000904	bta-miR-2434
novel_circ_000904	bta-miR-2466-3p
novel_circ_000904	bta-miR-2471-5p
novel_circ_000904	bta-miR-27a-5p
novel_circ_000904	bta-miR-376a
novel_circ_000904	bta-miR-376b
novel_circ_000904	bta-miR-376d
novel_circ_000904	bta-miR-376e
novel_circ_000904	bta-miR-380-3p
novel_circ_000904	bta-miR-412
novel_circ_000904	bta-miR-455-3p
novel_circ_000904	bta-miR-487a
novel_circ_000904	bta-miR-493
novel_circ_000904	bta-miR-543
novel_circ_000904	bta-miR-582
novel_circ_000904	bta-miR-584
novel_circ_000904	bta-miR-6122-5p
novel_circ_000904	bta-miR-677
novel_circ_000905	bta-miR-133a
novel_circ_000905	bta-miR-133b
novel_circ_000905	bta-miR-200c
novel_circ_000905	bta-miR-2284a
novel_circ_000905	bta-miR-2284b
novel_circ_000905	bta-miR-2284u
novel_circ_000905	bta-miR-2284y
novel_circ_000905	bta-miR-2311
novel_circ_000905	bta-miR-2329-5p
novel_circ_000905	bta-miR-2434
novel_circ_000905	bta-miR-27a-5p
novel_circ_000905	bta-miR-376e
novel_circ_000905	bta-miR-493
novel_circ_000905	bta-miR-543
novel_circ_000905	bta-miR-677
novel_circ_000923	bta-miR-1721
novel_circ_000923	bta-miR-181c
novel_circ_000923	bta-miR-181d
novel_circ_000923	bta-miR-218
novel_circ_000923	bta-miR-2340
novel_circ_000923	bta-miR-2350
novel_circ_000923	bta-miR-2377
novel_circ_000923	bta-miR-2411-5p
novel_circ_000923	bta-miR-3660
novel_circ_000923	bta-miR-411a
novel_circ_000923	bta-miR-503-5p
novel_circ_000923	bta-miR-6516
novel_circ_000923	bta-miR-6519
novel_circ_000939	bta-miR-101
novel_circ_000939	bta-miR-130a
novel_circ_000939	bta-miR-130b
novel_circ_000939	bta-miR-141
novel_circ_000939	bta-miR-197
novel_circ_000939	bta-miR-200a
novel_circ_000939	bta-miR-2284aa
novel_circ_000939	bta-miR-2284ab
novel_circ_000939	bta-miR-2284d
novel_circ_000939	bta-miR-2284k
novel_circ_000939	bta-miR-2284l
novel_circ_000939	bta-miR-2284m
novel_circ_000939	bta-miR-2284n
novel_circ_000939	bta-miR-2284z
novel_circ_000939	bta-miR-2292
novel_circ_000939	bta-miR-2339
novel_circ_000939	bta-miR-2483-3p
novel_circ_000939	bta-miR-27a-3p
novel_circ_000939	bta-miR-27b
novel_circ_000939	bta-miR-339a
novel_circ_000939	bta-miR-339b
novel_circ_000939	bta-miR-448
novel_circ_000939	bta-miR-454
novel_circ_000939	bta-miR-494
novel_circ_000939	bta-miR-544a
novel_circ_000939	bta-miR-544b
novel_circ_000943	bta-miR-197
novel_circ_000943	bta-miR-2284ab
novel_circ_000943	bta-miR-2284d
novel_circ_000943	bta-miR-2284k
novel_circ_000943	bta-miR-2284m
novel_circ_000943	bta-miR-2284n
novel_circ_000943	bta-miR-2292
novel_circ_000943	bta-miR-2471-3p
novel_circ_000943	bta-miR-329b
novel_circ_000943	bta-miR-429
novel_circ_000943	bta-miR-543
novel_circ_000944	bta-miR-197
novel_circ_000944	bta-miR-2284ab
novel_circ_000944	bta-miR-2284d
novel_circ_000944	bta-miR-2284k
novel_circ_000944	bta-miR-2284m
novel_circ_000944	bta-miR-2284n
novel_circ_000944	bta-miR-2292
novel_circ_000944	bta-miR-2471-3p
novel_circ_000944	bta-miR-29e
novel_circ_000944	bta-miR-329b
novel_circ_000944	bta-miR-429
novel_circ_000944	bta-miR-543
novel_circ_000946	bta-miR-2471-3p
novel_circ_000946	bta-miR-429
novel_circ_000946	bta-miR-543
novel_circ_000949	bta-miR-22-3p
novel_circ_000949	bta-miR-2292
novel_circ_000949	bta-miR-2326
novel_circ_000949	bta-miR-2363
novel_circ_000949	bta-miR-2394
novel_circ_000949	bta-miR-2471-3p
novel_circ_000949	bta-miR-29e
novel_circ_000949	bta-miR-30b-5p
novel_circ_000949	bta-miR-30c
novel_circ_000949	bta-miR-421
novel_circ_000949	bta-miR-429
novel_circ_000949	bta-miR-543
novel_circ_000949	bta-miR-6525
novel_circ_000949	bta-miR-654
novel_circ_000956	bta-miR-1271
novel_circ_000956	bta-miR-193a-5p
novel_circ_000956	bta-miR-2285z
novel_circ_000956	bta-miR-2293
novel_circ_000956	bta-miR-2339
novel_circ_000956	bta-miR-2486-3p
novel_circ_000956	bta-miR-2957
novel_circ_000956	bta-miR-362-5p
novel_circ_000956	bta-miR-376a
novel_circ_000956	bta-miR-376b
novel_circ_000956	bta-miR-376d
novel_circ_000956	bta-miR-431
novel_circ_000956	bta-miR-449d
novel_circ_000956	bta-miR-496
novel_circ_000956	bta-miR-574
novel_circ_000956	bta-miR-759
novel_circ_000958	bta-miR-196a
novel_circ_000958	bta-miR-196b
novel_circ_000958	bta-miR-2285j
novel_circ_000958	bta-miR-2307
novel_circ_000958	bta-miR-2318
novel_circ_000958	bta-miR-2375
novel_circ_000958	bta-miR-28
novel_circ_000958	bta-miR-592
novel_circ_000958	bta-miR-599
novel_circ_000958	bta-miR-708
novel_circ_000958	bta-miR-7691
novel_circ_000970	bta-miR-125a
novel_circ_000970	bta-miR-125b
novel_circ_000970	bta-miR-141
novel_circ_000970	bta-miR-193a
novel_circ_000970	bta-miR-200a
novel_circ_000970	bta-miR-20a
novel_circ_000970	bta-miR-21-5p
novel_circ_000970	bta-miR-2284y
novel_circ_000970	bta-miR-2385-5p
novel_circ_000970	bta-miR-2427
novel_circ_000970	bta-miR-2463
novel_circ_000970	bta-miR-3120
novel_circ_000970	bta-miR-320b
novel_circ_000970	bta-miR-3533
novel_circ_000970	bta-miR-378d
novel_circ_000970	bta-miR-449d
novel_circ_000970	bta-miR-499
novel_circ_000970	bta-miR-500
novel_circ_000970	bta-miR-631
novel_circ_000970	bta-miR-670
novel_circ_000971	bta-miR-125a
novel_circ_000971	bta-miR-125b
novel_circ_000971	bta-miR-141
novel_circ_000971	bta-miR-200a
novel_circ_000971	bta-miR-20a
novel_circ_000971	bta-miR-2385-5p
novel_circ_000971	bta-miR-499
novel_circ_000971	bta-miR-631
novel_circ_000971	bta-miR-670
novel_circ_000972	bta-miR-125a
novel_circ_000972	bta-miR-125b
novel_circ_000972	bta-miR-141
novel_circ_000972	bta-miR-200a
novel_circ_000972	bta-miR-20a
novel_circ_000972	bta-miR-2385-5p
novel_circ_000972	bta-miR-2463
novel_circ_000972	bta-miR-3120
novel_circ_000972	bta-miR-449d
novel_circ_000972	bta-miR-499
novel_circ_000972	bta-miR-500
novel_circ_000972	bta-miR-631
novel_circ_000972	bta-miR-670
novel_circ_000977	bta-miR-105a
novel_circ_000977	bta-miR-105b
novel_circ_000977	bta-miR-1281
novel_circ_000977	bta-miR-129-3p
novel_circ_000977	bta-miR-154c
novel_circ_000977	bta-miR-2284h-5p
novel_circ_000977	bta-miR-2285w
novel_circ_000977	bta-miR-2329-3p
novel_circ_000977	bta-miR-2338
novel_circ_000977	bta-miR-2424
novel_circ_000977	bta-miR-2427
novel_circ_000977	bta-miR-2431-5p
novel_circ_000977	bta-miR-2434
novel_circ_000977	bta-miR-33b
novel_circ_000977	bta-miR-3602
novel_circ_000977	bta-miR-376c
novel_circ_000977	bta-miR-432
novel_circ_000978	bta-miR-105a
novel_circ_000978	bta-miR-105b
novel_circ_000978	bta-miR-1256
novel_circ_000978	bta-miR-1281
novel_circ_000978	bta-miR-129-3p
novel_circ_000978	bta-miR-146b
novel_circ_000978	bta-miR-150
novel_circ_000978	bta-miR-2284h-3p
novel_circ_000978	bta-miR-2284h-5p
novel_circ_000978	bta-miR-2285w
novel_circ_000978	bta-miR-2317
novel_circ_000978	bta-miR-2329-3p
novel_circ_000978	bta-miR-2338
novel_circ_000978	bta-miR-2340
novel_circ_000978	bta-miR-2355-5p
novel_circ_000978	bta-miR-2424
novel_circ_000978	bta-miR-2427
novel_circ_000978	bta-miR-2431-5p
novel_circ_000978	bta-miR-2434
novel_circ_000978	bta-miR-2448-5p
novel_circ_000978	bta-miR-335
novel_circ_000978	bta-miR-33a
novel_circ_000978	bta-miR-33b
novel_circ_000978	bta-miR-3533
novel_circ_000978	bta-miR-376c
novel_circ_000978	bta-miR-432
novel_circ_000978	bta-miR-6525
novel_circ_001013	bta-miR-182
novel_circ_001013	bta-miR-186
novel_circ_001013	bta-miR-2285aa
novel_circ_001013	bta-miR-2299-5p
novel_circ_001013	bta-miR-2324
novel_circ_001013	bta-miR-2404
novel_circ_001013	bta-miR-365-3p
novel_circ_001014	bta-miR-1343-3p
novel_circ_001014	bta-miR-15a
novel_circ_001014	bta-miR-16b
novel_circ_001014	bta-miR-2957
novel_circ_001014	bta-miR-497
novel_circ_001023	bta-miR-132
novel_circ_001023	bta-miR-1721
novel_circ_001023	bta-miR-194
novel_circ_001023	bta-miR-2285s
novel_circ_001023	bta-miR-2464-5p
novel_circ_001023	bta-miR-2472
novel_circ_001023	bta-miR-25
novel_circ_001023	bta-miR-335
novel_circ_001023	bta-miR-545-3p
novel_circ_001023	bta-miR-653
novel_circ_001029	bta-miR-1814c
novel_circ_001029	bta-miR-216a
novel_circ_001029	bta-miR-2290
novel_circ_001029	bta-miR-2310
novel_circ_001029	bta-miR-2325a
novel_circ_001029	bta-miR-2371
novel_circ_001029	bta-miR-33b
novel_circ_001029	bta-miR-425-5p
novel_circ_001029	bta-miR-677
novel_circ_001030	bta-miR-145
novel_circ_001030	bta-miR-1814c
novel_circ_001030	bta-miR-216a
novel_circ_001030	bta-miR-2290
novel_circ_001030	bta-miR-2310
novel_circ_001030	bta-miR-2325a
[truncated: 43,611 more rows]
